# Supplementary material
Source: ML conference proceedings conference paper supplement (https://openaccess.thecvf.com/content/CVPR2026/html/Shen_LiDAR-to-4DRadar_Diffusion_Bridge_CVPR_2026_paper.html)
Supplement: Supplementary file 1 [file Shen_LiDAR-to-4DRadar_Diffusion_Bridge_CVPR_2026_supplemental.pdf]

# LiDAR-to-4DRadar Diffusion Bridge via Cross-Modal Alignment and Translation in Latent Space

## Supplementary Material

### A. Dataset and Preprocessing

Here, we use Kradar [30] dataset to train and evaluate our model. The Kradar dataset contains 3.5 frames of radar and LiDAR data collected in 58 scenes under various weather, including normal, fog, rain, sleet, overcast, and snow. The original radar data is represented as 4D tensor with the shape of (64, 256, 107, 37) for Doppler, Range, Azimuth, and Elevation. In particular, we removing the first Doppler bin due to its high noise level as shown in the original github code <sup>1</sup>. In addition, for computational efficiency without loss of important information, we crop the radar data along three spatial axes. Finally, the preprocessed radar data has the shape of (63, 192, 86, 32), covering Doppler  $[-2, 2]$ , m/s, Range  $[0, 88.4]$ , m, Azimuth  $[-48, 48]^\circ$ , and Elevation  $[-16, 16]^\circ$ .

In our experiments, we split the dataset with different settings for synthesis evaluation and downstream tasks evaluation. For synthesis evaluation, we randomly select 1k samples as the test set and other samples as the training set. For downstream tasks evaluation, we follow the split the dataset into three sets: training set, expansion set, and test set, with the ratio of 4:2:1. Specifically, we training our generative model on the training set and synthesize new radar data on the expansion set. Then, we turn to training the downstream tasks model using the synthesized radar data on the expansion set or the combination of the synthesized radar data and the training set. The detailed statistics of the dataset splits are shown in Table 1 and 2.

### B. Radar Noise Synthesis

To better capture real-world radar characteristics, we follow prior work [25] to synthesize radar noise and add it to generated radar data at inference. Specifically, the model first generates the Doppler-mean radar volume and the full Doppler vector for key voxels. We then inject synthesized noise into non-key voxels  $v_i = (r, a, e)$  around their mean  $f_i = \mathcal{R}(r, a, e)$ . We model the noise with a Gaussian-Softmax distribution:

$$\mathcal{R}_N(v_i) = f_i \cdot \text{Softmax}(\mathbf{z}), \quad \mathbf{z} \sim \mathcal{N}(\mathbf{0}, \delta^2 \mathbf{I}) \quad (10)$$

where  $\mathcal{N}(\mathbf{0}, \delta^2 \mathbf{I})$  is a  $D$ -dimensional multivariate normal distribution (with  $D$  the number of Doppler bins), and  $\delta$  controls the noise level. Below, we show RA-map examples after noise synthesis with  $\delta \in \{1.0, 2.0, 3.0\}$ , using the

<sup>1</sup>[https://github.com/kaist-avelab/K-Radar/blob/main/datasets/kradar\\_detection\\_v2\\_1.py](https://github.com/kaist-avelab/K-Radar/blob/main/datasets/kradar_detection_v2_1.py)

ground-truth Doppler-mean radar map. We set  $\delta = 2.0$  as it produces visualizations closest to the ground truth; more refined strategies (e.g., Doppler-bin-specific  $\delta$  values) are left for future work.

### C. Network Architecture and Training Details

Below we provide the detailed architectures and training configurations for our 4D Radar VAE and 3D U-Net in Table 6 and Table 7, respectively. The LiDAR VAE shares the same backbone as the 4D Radar VAE, but uses a single input/output channel. In particular, L2RLDBb is trained in three sequential stages: (1) train the 4D Radar VAE; (2) freeze the 4D Radar VAE, encode the radar training set into latent representations, and train the LiDAR VAE to align its latent space with the radar latents; (3) pre-encode and store both radar and LiDAR data as latents, then train the latent diffusion bridge on paired LiDAR-radar latents. This staged procedure reduces memory consumption and accelerates training.

The baseline architectures for Latent Diffusion and Pix2pixHD RAE are listed in Table 8 and Table 9, respectively, where we follow their original codes <sup>2</sup> and adopt them into the 3D data. The Latent Pix2pixHD follows the Pix2pixHD RAE design but operates in the VAE latent space (4 channels) and removes the explicit downsampling/upsampling stages.

Most models in our paper are built from 3D ResNet-style blocks, optionally augmented with self- or cross-attention. Specifically, we define the block variants as follows:

- **Res3D**: basic 3D ResNet block.
- **DownRes3D**: 3D ResNet block following with downsampling.
- **UpRes3D**: 3D ResNet block following with upsampling.
- **AttnRes3D**: 3D ResNet block following with self-attention mechanism.
- **DownAttnRes3D**: 3D ResNet block following with self-attention mechanism and downsampling
- **AttnUpRes3D**: 3D ResNet block following with self-attention mechanism and upsampling.
- **CrossAttnDownRes3D**: 3D ResNet block following with cross-attention mechanism and downsampling.
- **CrossAttnUpRes3D**: 3D ResNet block following with cross-attention mechanism and upsampling.

<sup>2</sup><https://github.com/NVIDIA/pix2pixHD/>

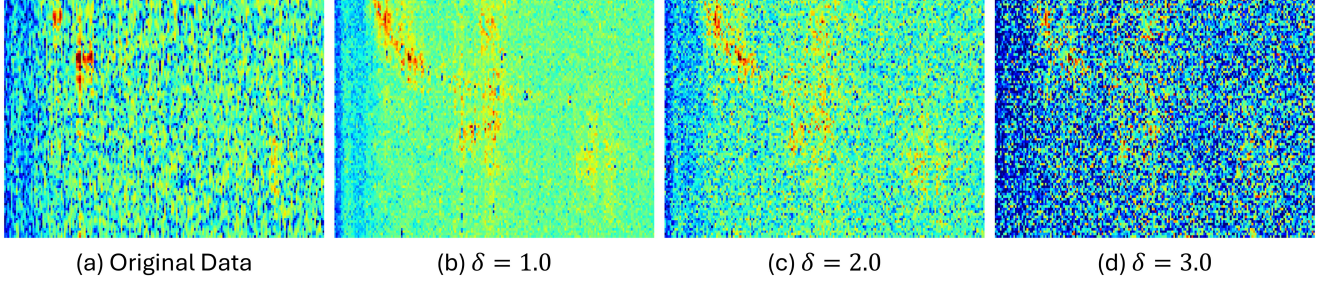

Figure 5. The RA map at one Doppler bin with different  $\delta$ .

| Dataset  | Total  | Normal | Overcast | Rain  | Sleet | Fog   | Snow  |
|----------|--------|--------|----------|-------|-------|-------|-------|
| Training | 33,994 | 12,393 | 802      | 4,644 | 6,842 | 3,483 | 5,830 |
| Test     | 1,000  | 390    | 22       | 136   | 198   | 95    | 159   |

Table 1. Dataset splitting for synthesis evaluation.

| Dataset    | Total  | Object Num | Normal | Overcast | Rain  | Sleet | Fog   | Snow  |
|------------|--------|------------|--------|----------|-------|-------|-------|-------|
| Train      | 20,000 | 51,102     | 7,316  | 455      | 2,737 | 4,032 | 2,007 | 3,453 |
| Validation | 9,992  | 25,650     | 3,648  | 240      | 1,379 | 2,005 | 1,047 | 1,673 |
| Test       | 5,000  | 12,069     | 1,817  | 129      | 664   | 1,003 | 524   | 863   |

Table 2. Dataset splitting for downstream detection evaluation.

## D. Details on Evaluation Metric

In experiments, we report MAE, PSNR, and SSIM in (i) Polar RAE space (Range–Azimuth–Elevation, after Doppler aggregation) and (ii) Cartesian XYZ space (after coordinate projection). Let the generated 4D radar tensor be  $\hat{R} \in \mathbb{R}^{D \times R \times A \times E}$  and the ground truth  $R \in \mathbb{R}^{D \times R \times A \times E}$ , where  $D$  = Doppler bins,  $R$  = range bins,  $A$  = azimuth bins, and  $E$  = elevation bins.

**Doppler-mean Radar Matrix.** We first form Doppler-mean 3D volumes

$$\bar{R}(r, a, e) = \frac{1}{D} \sum_{d=1}^D R(d, r, a, e). \quad (11)$$

**RAE  $\rightarrow$  XYZ projection.** Let  $(r_i, a_j, e_k)$  be the physical center of bin  $(i, j, k)$  with  $r_i \in \mathbb{R}_+$ ,  $a_j, e_k$  in radians. We map to Cartesian coordinates:

$$\begin{aligned} x &= r_i \cos(e_k) \sin(a_j), \\ y &= r_i \cos(e_k) \cos(a_j), \\ z &= r_i \sin(e_k). \end{aligned} \quad (12)$$

We construct a fixed Cartesian grid  $C \in \mathbb{R}^{X \times Y \times Z}$  covering the spatial extent. Each polar voxel intensity  $\bar{R}(r_i, a_j, e_k)$  is splatted (trilinear weighting) into  $C$  producing  $C$  (ground truth) and  $\hat{C}$  (generated). Metrics in XYZ space are then computed between  $\hat{C}, C \in \mathbb{R}^{X \times Y \times Z}$ .

For clarity, we let  $(H, W, L)$  denote  $(R, A, E)$  in RAE space and  $(X, Y, Z)$  in XYZ space; unless otherwise specified for key-point/Doppler metrics, all evaluations use Doppler-mean volumes.

**Mean Absolute Error (MAE).** The MAE metric calculates the average absolute difference between the generated radar volume  $\hat{R}$  and the ground-truth radar volume  $R$ :

$$\text{MAE} = \frac{1}{HWL} \sum_{i=1}^H \sum_{j=1}^W \sum_{k=1}^L |R(i, j, k) - \hat{R}(i, j, k)|. \quad (13)$$

**Peak Signal-to-Noise Ratio (PSNR).** The PSNR metric measures the ratio between the maximum possible power of a signal and the power of corrupting noise that affects the fidelity of its representation. It is defined as:

$$\text{PSNR} = 10 \cdot \log_{10} \left( \frac{MAX^2}{\text{MSE}(\hat{R} - R)} \right), \quad (14)$$

where  $MAX$  is the maximum possible pixel range of the radar volume, and  $\text{MSE}$  is the Mean Squared Error between the generated radar volume  $\hat{R}$  and the ground-truth radar volume  $R$ .

**Structural Similarity Index Measure (SSIM).** The SSIM metric evaluates the similarity between two images by considering luminance, contrast, and structural information. It is defined as:

$$\text{SSIM}(R, \hat{R}) = \frac{(2\mu_R \mu_{\hat{R}} + C_1)(2\sigma_{R\hat{R}} + C_2)}{(\mu_R^2 + \mu_{\hat{R}}^2 + C_1)(\sigma_R^2 + \sigma_{\hat{R}}^2 + C_2)}, \quad (15)$$

| Steps     | Time↓  | XYZ Space Metric |              |               | RAE Space Metric |              |               | Key Point/Doppler Metric |              |               |
|-----------|--------|------------------|--------------|---------------|------------------|--------------|---------------|--------------------------|--------------|---------------|
|           |        | MAE↓             | PSNR↑        | SSIM↑         | MAE↓             | PSNR↑        | SSIM↑         | MAE↓                     | PSNR↑        | IoU↑          |
| Steps =1  | 0.1004 | 0.1028           | 27.51        | 0.8740        | 0.1626           | 25.37        | 0.6718        | 0.6078                   | 22.39        | 0.1959        |
| Steps =3  | 0.2385 | <b>0.05255</b>   | 33.01        | <b>0.9092</b> | <b>0.09820</b>   | <b>29.21</b> | <b>0.7324</b> | <b>0.5452</b>            | <b>23.44</b> | <b>0.2885</b> |
| Steps =5  | 0.4139 | 0.05308          | <b>33.11</b> | 0.9061        | 0.09901          | 29.10        | 0.7274        | 0.5425                   | 23.49        | 0.2846        |
| Steps =10 | 0.8487 | 0.05339          | 33.02        | 0.9043        | 0.09976          | 29.01        | 0.7244        | 0.5442                   | 23.46        | 0.2794        |
| Steps =20 | 1.0540 | 0.05358          | 32.97        | 0.9036        | 0.1002           | 28.97        | 0.7230        | 0.5451                   | 23.44        | 0.2768        |

Table 3. The generative performance under different diffusion steps. Best value in each column is highlighted in bold.

| $\lambda_{bce}$ | XYZ Space Metric |              |               | RAE Space Metric |              |               | Key Point/Doppler Metric |              |               |
|-----------------|------------------|--------------|---------------|------------------|--------------|---------------|--------------------------|--------------|---------------|
|                 | MAE↓             | PSNR↑        | SSIM↑         | MAE↓             | PSNR↑        | SSIM↑         | MAE↓                     | PSNR↑        | IoU↑          |
| 0.0             | 0.03192          | 40.62        | 0.9781        | 0.06092          | 34.61        | 0.8649        | 0.4629                   | 25.04        | 0.08655       |
| 0.3             | 0.03192          | 40.62        | 0.9781        | 0.05829          | 35.10        | <b>0.8688</b> | 0.4610                   | 25.07        | 0.8145        |
| 0.5             | 0.03063          | 42.01        | <b>0.9791</b> | <b>0.05817</b>   | <b>35.11</b> | 0.8685        | <b>0.4607</b>            | <b>25.10</b> | 0.8798        |
| 0.7             | <b>0.03040</b>   | <b>42.50</b> | 0.9790        | 0.05919          | 34.94        | 0.8653        | 0.4608                   | 25.06        | <b>0.9219</b> |

Table 4. The reconstruction performance of 4DRadar VAE with different  $\lambda_{bce}$  values. The best value in each column is highlighted in bold.

| $\lambda_{cont}$ | XYZ Space Metric |              |               | RAE Space Metric |              |               | Key Point/Doppler Metric |              |               |
|------------------|------------------|--------------|---------------|------------------|--------------|---------------|--------------------------|--------------|---------------|
|                  | MAE↓             | PSNR↑        | SSIM↑         | MAE↓             | PSNR↑        | SSIM↑         | MAE↓                     | PSNR↑        | IoU↑          |
| 0.0              | 0.05332          | 32.85        | 0.9037        | 0.09920          | 29.00        | 0.7236        | 0.5517                   | 23.35        | 0.2626        |
| 0.3              | <b>0.05250</b>   | <b>33.01</b> | <b>0.9092</b> | 0.09820          | <b>29.21</b> | 0.7324        | <b>0.5452</b>            | 23.44        | 0.2885        |
| 0.5              | 0.05280          | 32.98        | 0.9089        | <b>0.09800</b>   | 29.11        | 0.7313        | 0.5484                   | 23.43        | 0.2765        |
| 0.7              | 0.05251          | 33.97        | 0.9090        | 0.09827          | 29.14        | <b>0.7325</b> | 0.5463                   | <b>23.45</b> | <b>0.2905</b> |

Table 5. The generative performance under different  $\lambda_{cont}$  values. The best value in each column is highlighted in bold.

where  $\mu_R$  and  $\mu_{\hat{R}}$  are the mean values of  $R$  and  $\hat{R}$ , respectively;  $\sigma_R^2$  and  $\sigma_{\hat{R}}^2$  are the variances of  $R$  and  $\hat{R}$ , respectively;  $\sigma_{R\hat{R}}$  is the covariance between  $R$  and  $\hat{R}$ ; and  $C_1$  and  $C_2$  are small constants to stabilize the division.

## E. Discussion on Inference Steps

Here, we analyze the influence of different diffusion steps during inference on the generative performance and time consumption. Tab. 3 shows the quantitative results. We can find that using 3 steps during inference achieves the best generative performance with a moderate time consumption.

## F. Parameter Analysis on $\lambda_{bce}$ and $\lambda_{cont}$

Here, we analyze the impact of two loss weights in the 4D Radar VAE and LiDAR VAE:  $\lambda_{bce}$  for the BCE key-voxel mask loss  $BCE(M_{key}, \hat{M}_{key})$  and  $\lambda_{cont}$  for the contrastive loss  $\mathcal{L}_{cont}$ . Tab. 4 reports the reconstruction performance of the 4D Radar VAE under varying  $\lambda_{bce}$ . The model performs best at  $\lambda_{bce} \in \{0.5, 0.7\}$ ; we set  $\lambda_{bce} = 0.5$  to balance the three types of metrics. Tab. 5 shows the generative performance of L2RLDB with LiDAR VAEs under different  $\lambda_{cont}$  values. Performance is similar for  $\lambda_{cont} > 0$  and consistently better than  $\lambda_{cont} = 0$ , demonstrating the ef-

fectiveness of the contrastive loss. We set  $\lambda_{cont} = 0.3$  to achieve the best overall metrics.

## G. More Qualitative Results

Here, we provide additional qualitative results of L2RLDB and the baselines. First, we compare RA maps across weather conditions. Doppler-mean RA maps are shown in Fig. 9 and Fig. 10, while single-Doppler-bin RA maps and key-voxel comparisons are given in Fig. 11–14. Overall, our method produces structures visually closest to the ground truth, better preserving target returns and background clutter while avoiding over-smoothing and speckle artifacts. By contrast, baselines tend to blur weak echoes or introduce spurious speckles. Second, we show AE (Azimuth–Elevation) maps of the generations in Fig. 6 and Fig. 7. Our results exhibit the similar highlighted region with the ground truth, consistent with the RA-view observations. Third, consistent with Sec. 5.2, synthetic radar under fog and sleet yields limited or no improvement in downstream detection. As shown in Fig. 8, severe attenuation and low SNR suppress weak echoes and reduce local contrast, making small objects hard to separate from background clutter, which causing the high error for key-voxel identification in the last line.

| Component           | Parameter                     | Value                                                |
|---------------------|-------------------------------|------------------------------------------------------|
| <b>Encoder</b>      | Input Channels                | 64 (1 for Doppler-mean RAE + 63 for Doppler vectors) |
|                     | Input Resolution              | [192,96,32]                                          |
|                     | Block Types                   | [DownRes3D, DownRes3D, DownAttnRes3D]                |
|                     | Block Output Channels         | [64, 128, 256]                                       |
|                     | Attention Header Channels     | 8                                                    |
|                     | Layers per Block              | 2                                                    |
| <b>Latent Space</b> | Mid Block                     | AttnRes3D                                            |
|                     | Layers per Block              | 2                                                    |
|                     | Output                        | $\mu, \log(\sigma^2)$                                |
|                     | Latent Shape                  | (4, 48, 24, 8)                                       |
|                     | Downsampling Factor           | 4×                                                   |
| <b>Decoder</b>      | Block Types                   | [AttnUpDecoder3D, UpDecoder3D, UpDecoder3D]          |
|                     | Block Output Channels         | [256, 128, 64]                                       |
|                     | Attention Header Channels     | 8                                                    |
|                     | Layers per Block              | 2                                                    |
|                     | Output Channels               | 64 (1 for Doppler-mean RAE + 63 for Doppler vectors) |
|                     | Key-Voxel Mask Output Channel | 1                                                    |
| <b>Training</b>     | Batch Size                    | 16                                                   |
|                     | Learning Rate                 | $1 \times 10^{-4}$                                   |
|                     | Optimizer                     | Adam                                                 |
|                     | Adam $\beta_1 / \beta_2$      | 0.9 / 0.999                                          |
|                     | Weight Decay                  | $1 \times 10^{-6}$                                   |
|                     | Total Parameters              | ~34.77M                                              |
|                     | Iterations                    | 100k                                                 |

Table 6. 4DRadar VAE network architecture and training configuration

| Component          | Parameter                | Value                                 |
|--------------------|--------------------------|---------------------------------------|
| <b>Down Blocks</b> | Input Channels           | 4                                     |
|                    | Input Resolution         | (48, 24, 8)                           |
|                    | Block Types              | [DownRes3D, DownRes3D, AttnDownRes3D] |
|                    | Block Output Channels    | [128, 256, 512]                       |
|                    | Attention Head Channels  | 32                                    |
|                    | Layers per Block         | 2                                     |
| <b>Mid Block</b>   | Block Type               | AttnRes3D                             |
|                    | Layers per Block         | 2                                     |
| <b>Up Blocks</b>   | Block Types              | [AttnUpRes3D, AttnUpRes3D, UpRes3D]   |
|                    | Skip Connections         | True                                  |
|                    | Block Output Channels    | [512, 256, 128]                       |
|                    | Attention Head Channels  | 32                                    |
|                    | Layers per Block         | 2                                     |
|                    | Output Channels          | 4                                     |
| <b>Time Step</b>   | Diffusion steps          | 1000                                  |
|                    | Scheduler                | Linear                                |
|                    | Embedding Types          | Sinusoidal                            |
|                    | Time Scale Shift         | AdaLN                                 |
| <b>Training</b>    | Batch Size               | 64                                    |
|                    | Learning Rate            | $1 \times 10^{-4}$                    |
|                    | Optimizer                | AdamW                                 |
|                    | Adam $\beta_1 / \beta_2$ | 0.95 / 0.999                          |
|                    | Weight Decay             | $1 \times 10^{-6}$                    |
|                    | Total Parameters         | ~162.10M                              |
|                    | Iterations               | 100k                                  |

Table 7. The UNet3D network architecture in L2RLDB and training configuration

| Component          | Parameter                | Value                                               |
|--------------------|--------------------------|-----------------------------------------------------|
| <b>Down Blocks</b> | Input Channels           | 4                                                   |
|                    | Input Resolution         | (48, 24, 8)                                         |
|                    | Block Types              | [DownRes3D, CrossAttnDownRes3D, CrossAttnDownRes3D] |
|                    | Block Output Channels    | [128, 256, 512]                                     |
|                    | Attention Head Channels  | 32                                                  |
|                    | Layers per Block         | 2                                                   |
| <b>Mid Block</b>   | Block Type               | AttenRes3D                                          |
|                    | Layers per Block         | 2                                                   |
| <b>Up Blocks</b>   | Block Types              | [CrossAttnUpRes3D, CrossAttnUpRes3D, UpRes3D]       |
|                    | Skip Connections         | True                                                |
|                    | Block Output Channels    | [512, 256, 128]                                     |
|                    | Attention Head Channels  | 32                                                  |
|                    | Layers per Block         | 2                                                   |
|                    | Output Channels          | 4                                                   |
| <b>Time Step</b>   | Diffusion steps          | 1000                                                |
|                    | Scheduler                | Linear                                              |
|                    | Embedding Types          | Sinusoidal                                          |
|                    | Time Scale Shift         | AdaLN                                               |
| <b>Training</b>    | Batch Size               | 64                                                  |
|                    | Learning Rate            | $1 \times 10^{-4}$                                  |
|                    | Optimizer                | AdamW                                               |
|                    | Adam $\beta_1 / \beta_2$ | 0.95 / 0.999                                        |
|                    | Weight Decay             | $1 \times 10^{-6}$                                  |
|                    | Total Parameters         | $\sim 178.69M$                                      |
|                    | Iterations               | 100k                                                |

Table 8. The UNet3D network architecture in latent diffusion and training configuration

| Component            | Parameter                | Value                               |
|----------------------|--------------------------|-------------------------------------|
| <b>Generation</b>    | Input Channels           | 1 (LiDAR)                           |
|                      | Input Resolution         | (192, 96, 32)                       |
|                      | Down Blocks              | [Conv3D, Conv3D, Conv3D, Conv3D]    |
|                      | Down Stride              | [1, 2, 2, 2]                        |
|                      | Down Channels            | [64, 64, 126, 256]                  |
|                      | Down Kernel Size         | [7, 3, 3, 3]                        |
|                      | Resnet Blocs             | [Resnet] *6                         |
|                      | Resnet Channels          | [256] * 6                           |
|                      | Up Blocks                | [ConvT3D, ConvT3D, ConvT3D, Conv3D] |
|                      | Up Stride                | [2, 2, 2, 1]                        |
|                      | Up Channels              | [256, 126, 64, 64]                  |
|                      | Up Kernel Size           | [3, 3, 3, 7]                        |
|                      | Activation Function      | ReLU                                |
|                      | Output Channel           | 64 (Radar)                          |
| <b>Discriminator</b> | Input Channels           | 64 (Radar)+1 (LiDAR)                |
|                      | Input Resolution         | (192, 96, 32)                       |
|                      | Layers                   | [Conv3D, Conv3D, Conv3D, Conv3D]    |
|                      | Layers Stride            | [2, 2, 1, 1]                        |
|                      | Layers Channels          | [64, 128, 256, 1]                   |
|                      | Up Kernel Size           | [4, 4, 4, 4]                        |
|                      | Activation Function      | LeakyReLU(0.2)                      |
|                      | Output Channel           | 1                                   |
| <b>Training</b>      | Batch Size               | 32                                  |
|                      | Learning Rate            | $1 \times 10^{-4}$                  |
|                      | Optimizer                | Adam                                |
|                      | Adam $\beta_1 / \beta_2$ | 0.95 / 0.999                        |
|                      | Weight Decay             | $1 \times 10^{-6}$                  |
|                      | Total Parameters         | $\sim 95.34M$                       |
|                      | Iterations               | 30k                                 |

Table 9. The network architecture in Pix2pixHD RAE and training configuration

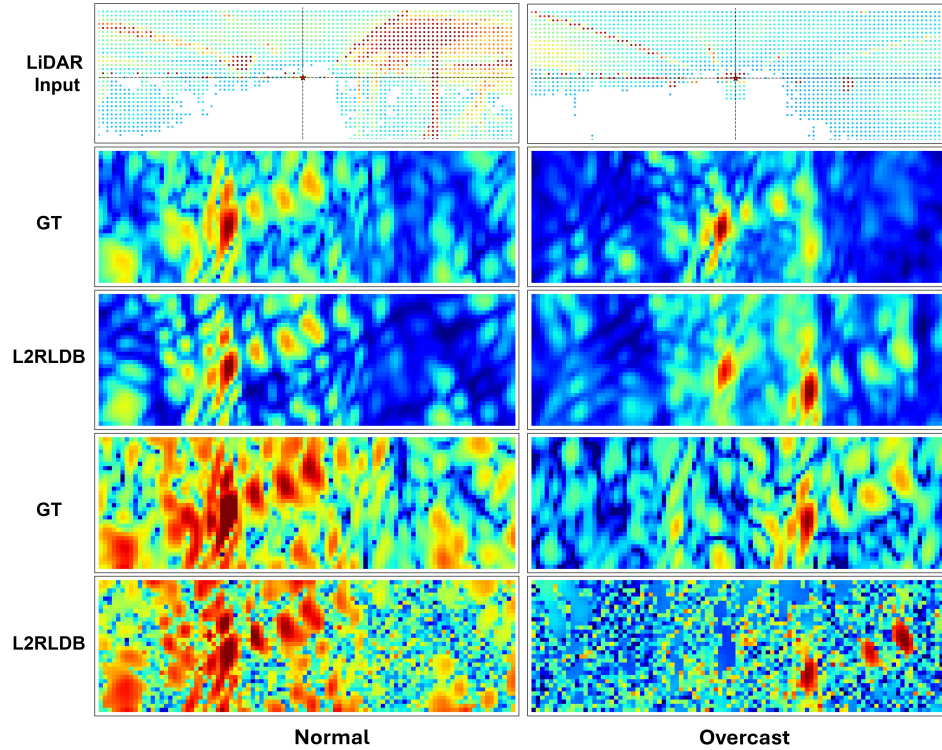

Figure 6. Azimuth–Elevation (AE) maps at a fixed range bin. Top row: ground truth. Subsequent rows show (i) Doppler-averaged AE maps for the ground truth and L2RLDB, and (ii) AE maps at a single Doppler bin. Weather conditions are labeled below each column.

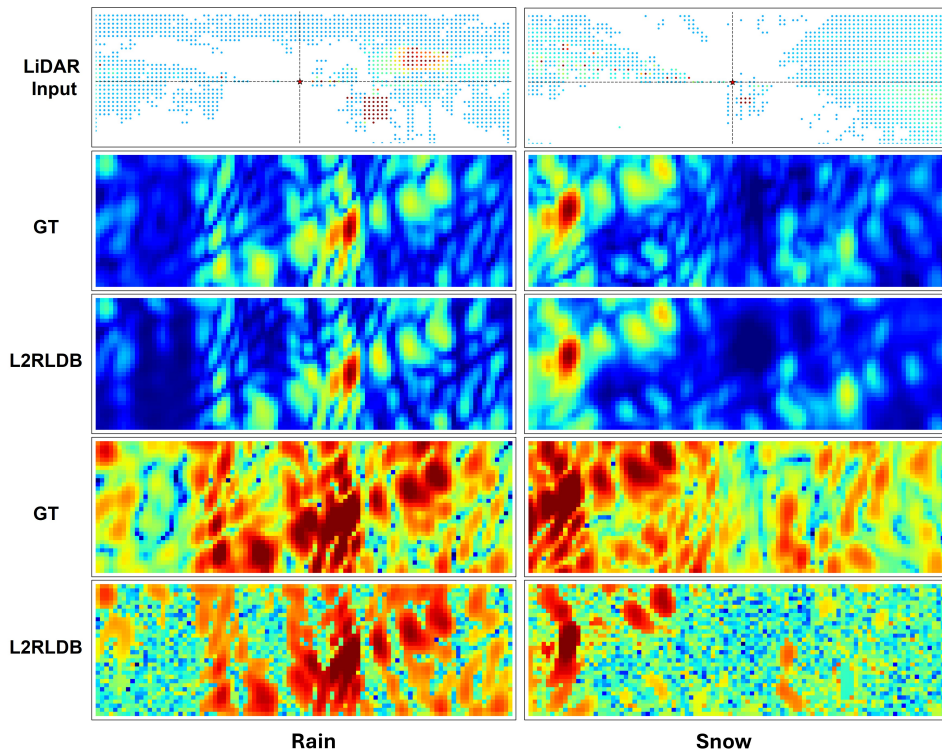

Figure 7. Azimuth–Elevation (AE) maps at a fixed range bin. Top row: ground truth. Subsequent rows show (i) Doppler-averaged AE maps for the ground truth and L2RLDB, and (ii) AE maps at a single Doppler bin. Weather conditions are labeled below each column.

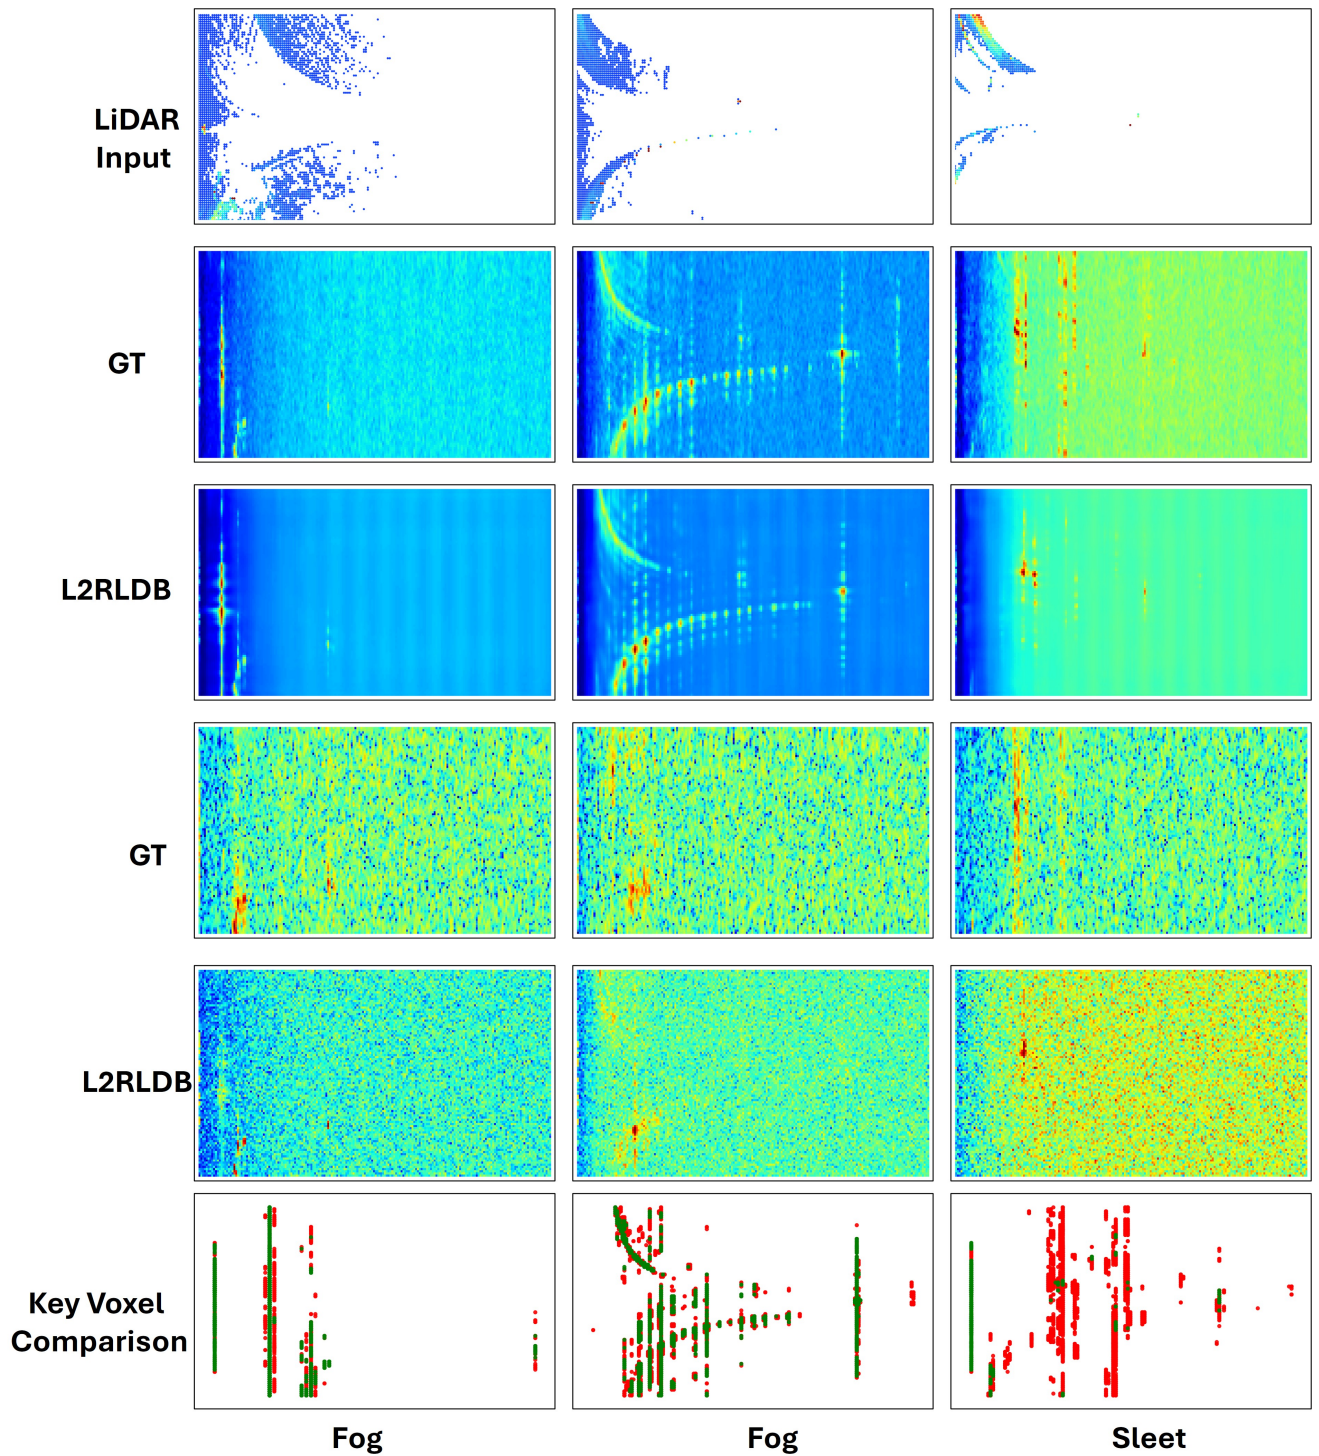

Figure 8. Comparison between ground-truth 4D radar and L2RLDB-generated results in fog and sleet conditions. Top row: LiDAR input. Middle four rows: Doppler-mean RA maps and single-Doppler-bin RA maps for the ground truth and L2RLDB. Bottom row: key-voxel identification results.

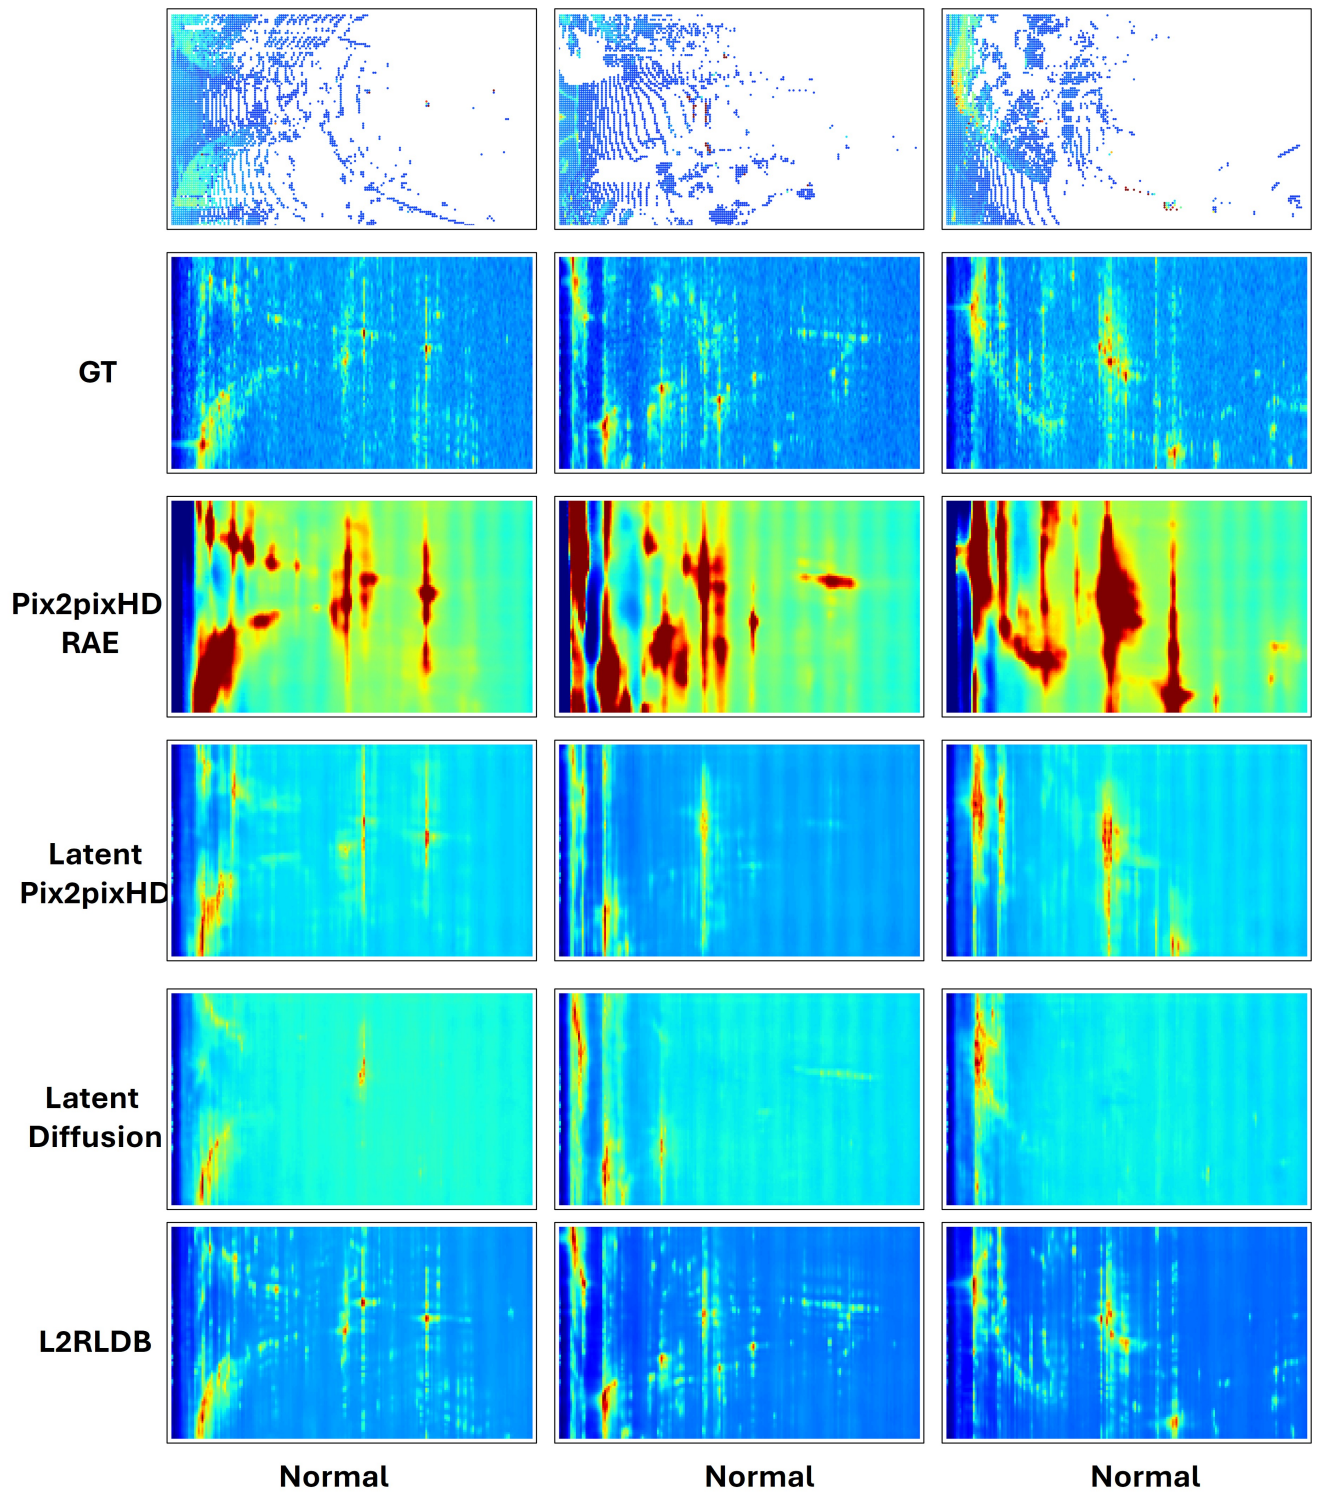

Figure 9. More results of Doppler-mean RA maps under different weather conditions. Top row: ground truth. Subsequent rows show results from baselines and L2RLDB. Weather conditions are labeled below each column.

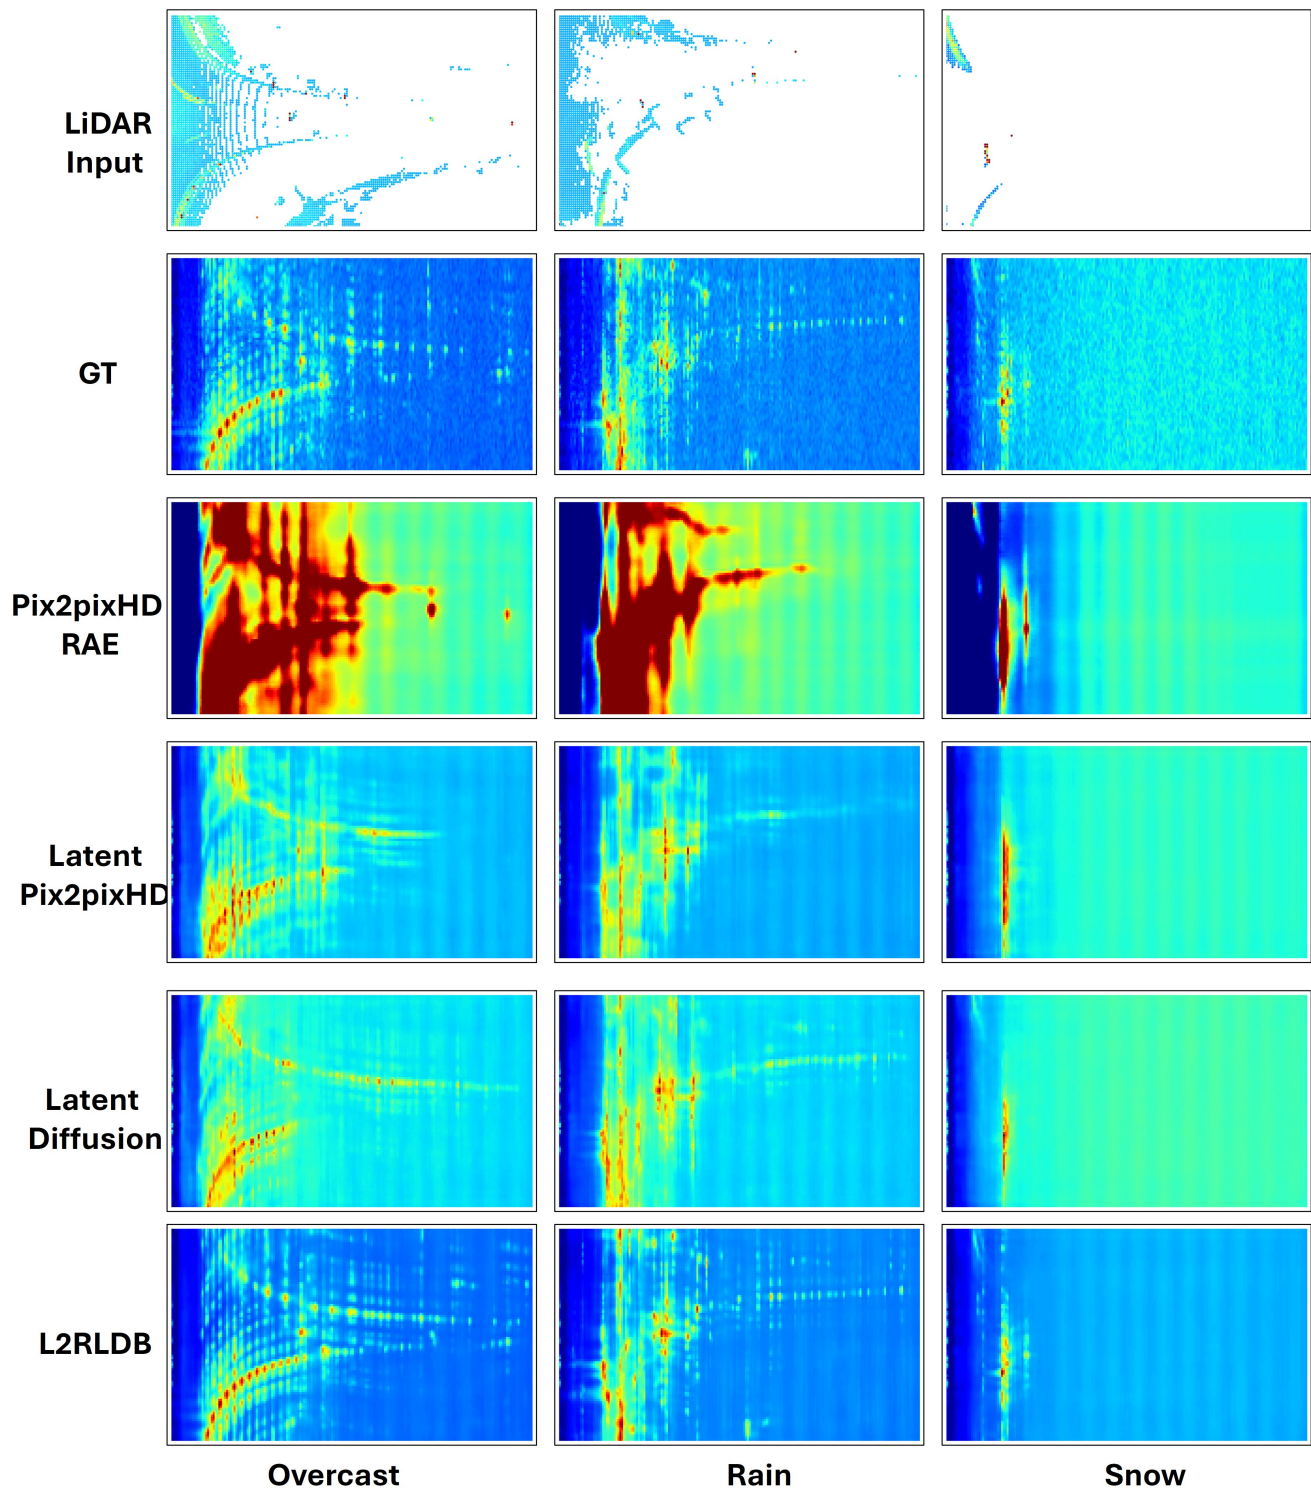

Figure 10. More results of Doppler-mean RA maps under different weather conditions. Top row: ground truth. Subsequent rows show results from baselines and L2RLDB. Weather conditions are labeled below each column.

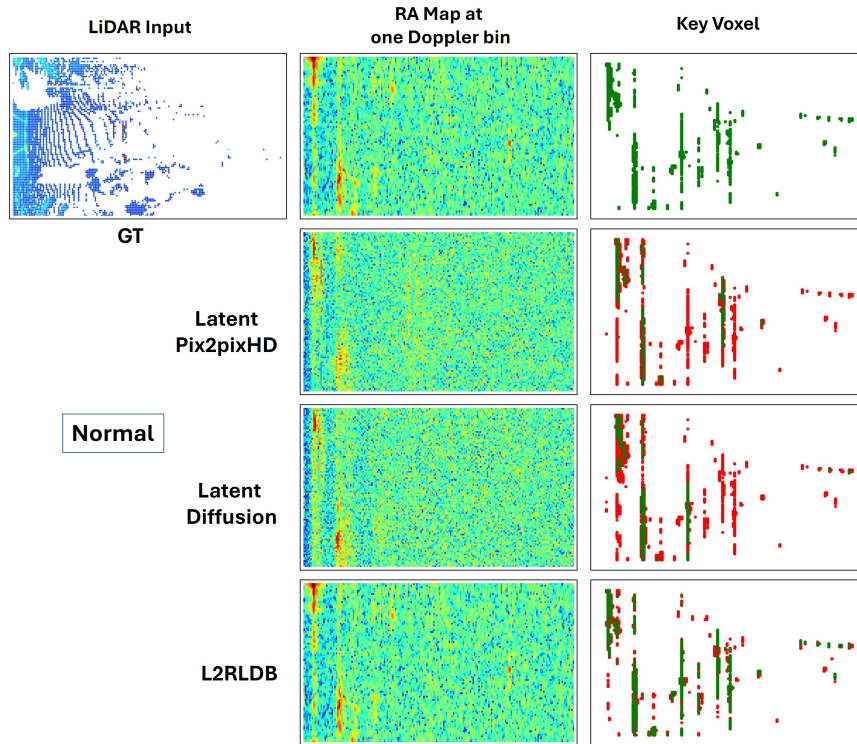

Figure 11. More RA maps at a single Doppler bin under the normal weather. The top row shows ground truth; subsequent rows show baselines and L2RLDB.

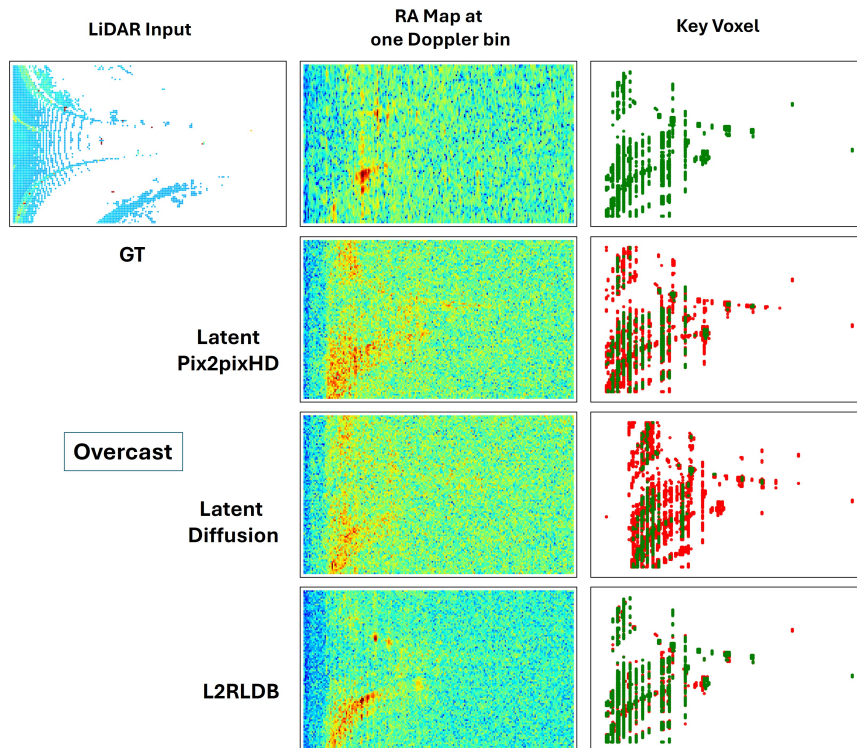

Figure 12. More RA maps at a single Doppler bin under the overcast weather. The top row shows ground truth; subsequent rows show baselines and L2RLDB.

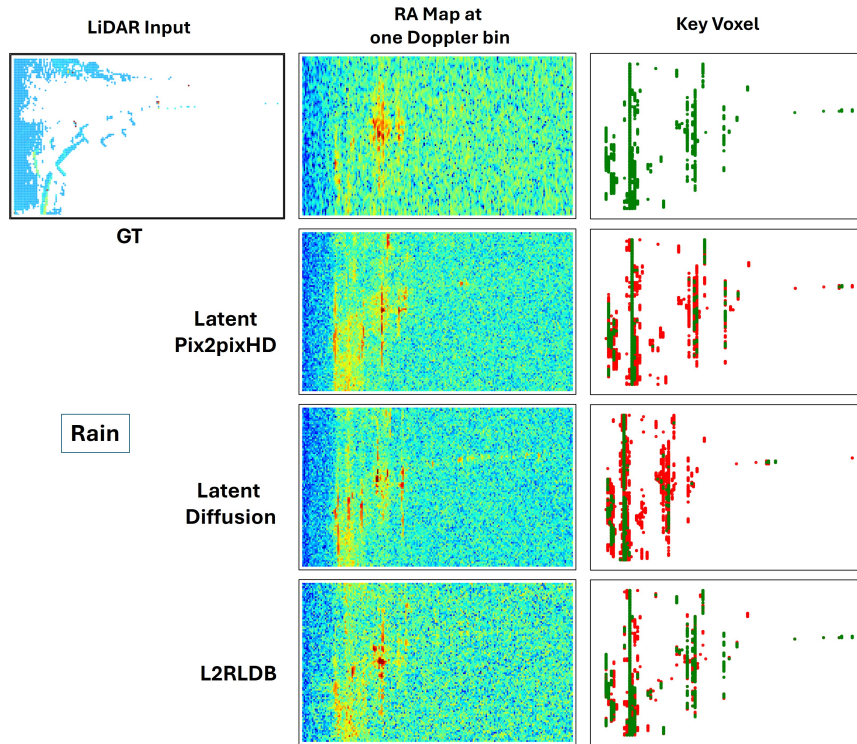

Figure 13. More RA maps at a single Doppler bin under the rain weather. The top row shows ground truth; subsequent rows show baselines and L2RLDB.

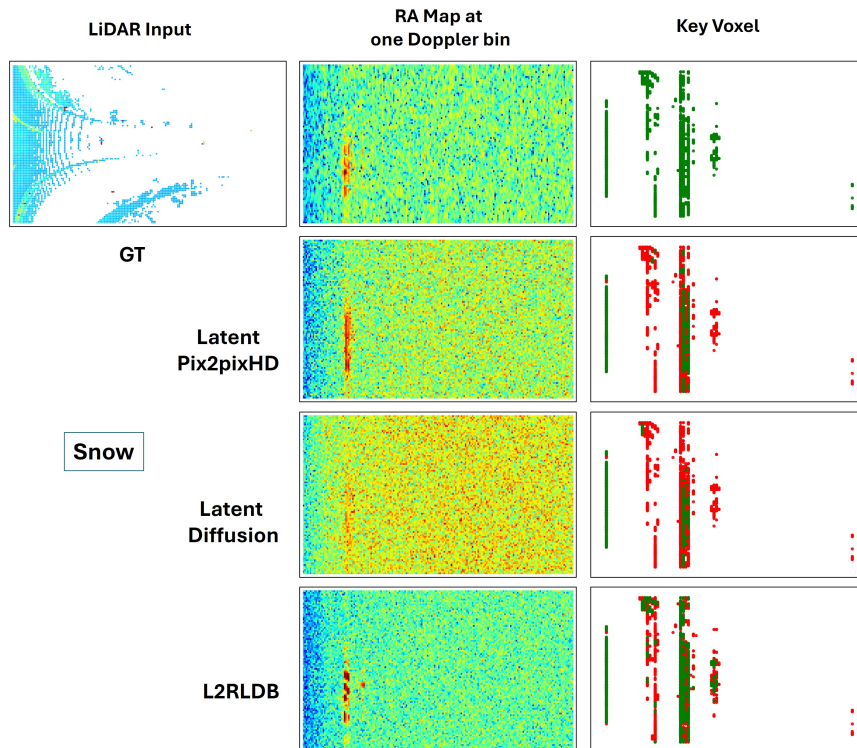

Figure 14. More RA maps at a single Doppler bin under the snow weather. The top row shows ground truth; subsequent rows show baselines and L2RLDB.
